# Supplementary figures and images for: CXCR4-CXCL12-CXCR7 and PD-1/PD-L1 in Pancreatic Cancer: CXCL12 Predicts Survival of Radically Resected Patients
Source: MDPI journal article supplement (doi:10.3390/cells11213340), 2022-10-22

Supplementary Figure S1.

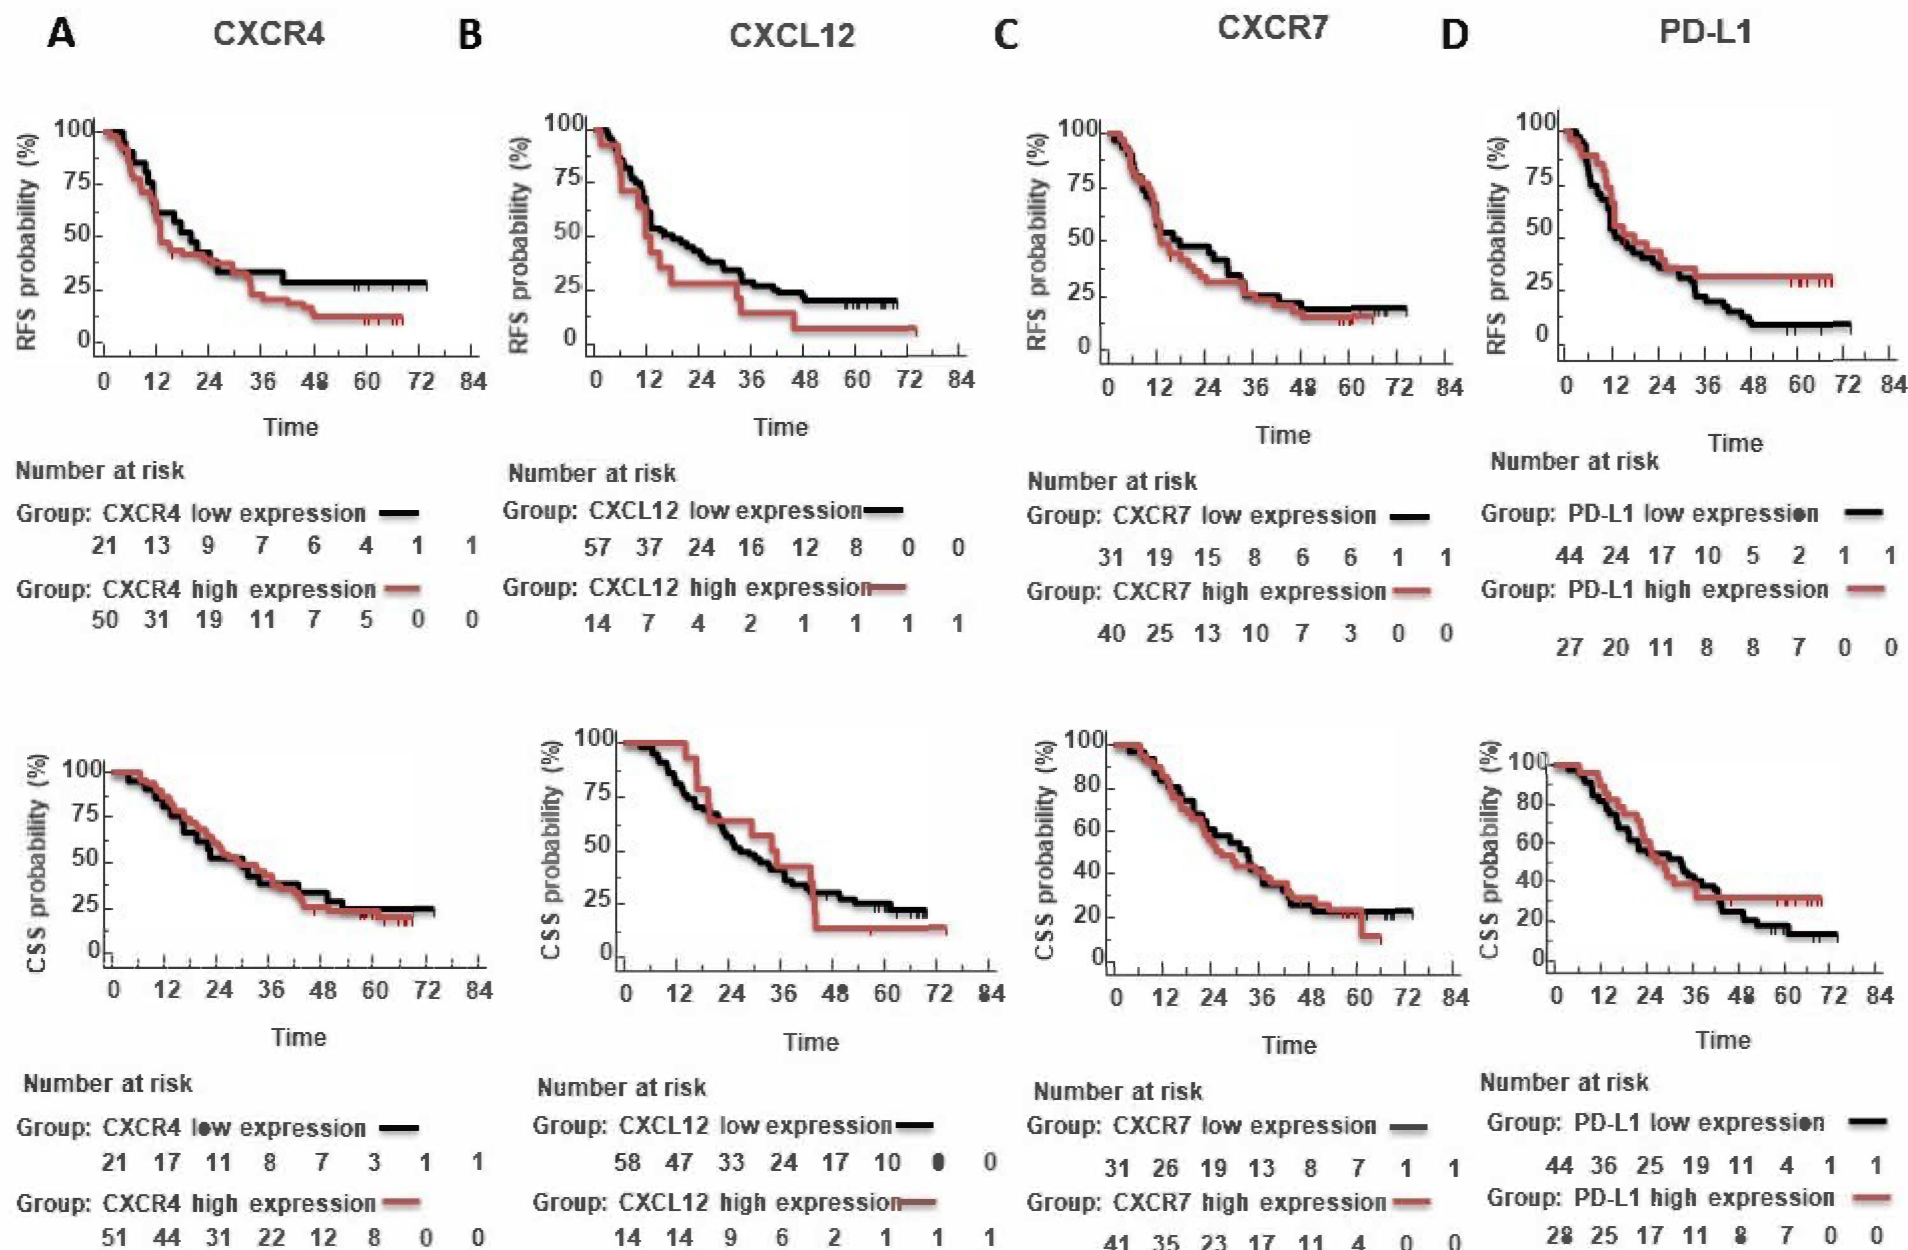

Supplement: s1 [file s1]
